# Supplementary material for: Substituent effect and wavelength dependence of the photoinduced Ru–O homolysis in the [Ru(bpy)2(py-SO3)]+-type complexes
Source: Royal Society of Chemistry journal article supplement (doi:10.1039/c5dt03694a), 2016-01-01
Supplement: c5dt03694a1.pdf [file c5dt03694a1.pdf]

## Electronic Supplementary Information

### Substituent effect and wavelength dependence of the photoinduced Ru-O homolysis in the [Ru(bpy)<sub>2</sub>(py-SO<sub>3</sub>)]<sup>+</sup>-type complexes

Yue Zheng,<sup>ab</sup> Qian-Xiong Zhou,<sup>\*a</sup> Yang-Yang Zhang,<sup>ab</sup> Chao Li,<sup>a</sup> Yuan-Jun Hou<sup>a</sup> and Xue-Song Wang<sup>\*a</sup>

<sup>a</sup>Key Laboratory of Photochemical Conversion and Optoelectronic Materials, Technical Institute of Physics and Chemistry, Chinese Academy of Sciences, Beijing 100190, P. R. China. Fax: +86-10-62564049; Tel: +86-10-82543592; E-mail: xswang@mail.ipc.ac.cn (X. Wang); zhouqianxiong@mail.ipc.ac.cn (Q. Zhou).  
<sup>b</sup>Graduate School of Chinese Academy of Sciences, Beijing 100049, P. R. China.

**Instruments and methods**

<sup>1</sup>H NMR spectra were obtained on a Bruker DMX-400 MHz. High-resolution ESI-MS spectra were determined on a Bruker APEX IV (7.0T) FT\_MS. Elemental analysis was performed on an Elementar Vario EL instrument. UV-vis absorption and 77 K emission spectra were recorded on a Shimadzu UV-1601 spectrophotometer and Hitachi F-4600 fluorescence spectrophotometer, respectively.

Oil/water partition coefficients ( $\log P_{O/W}$ ) were determined at room temperature following a reported method.<sup>1</sup> Typically, 1 mL of aqueous solutions of the examined complexes (25  $\mu$ M) were mixed with 1 mL of *n*-octanol and sonicated for 30 min. After separation by centrifugation, the amounts of complex in each phase were quantified by the absorbance at absorption maximum of the examined complex. The results were the average of three independent measurements.

The EPR spectra were measured on a Bruker ESP-300E spectrometer at 9.8 GHz, X-band, with 100 Hz field modulation. Samples were injected quantitatively into quartz capillaries, purged with argon for 20 min in the dark, and illuminated in the cavity of the EPR spectrometer with a Nd:YAG laser at 355 nm or 532 nm (5-6 ns of pulse width, 10 Hz of repetition frequency, 30 mJ/pulse energy).

The redox potentials were measured on an EG&G Model283 Potentiostat/Galvanostat in a three-electrode cell with a glassy carbon working electrode, a Pt counter electrode, and a saturated calomel electrode (SCE) as reference. The cyclic voltammetry was conducted at a scan rate of 50 mV s<sup>-1</sup> in Ar-saturated, anhydrous CH<sub>3</sub>CN containing 0.1 M tetra-*n*-butylammonium hexafluorophosphate as the supporting electrolyte.

All calculations were performed with the Gaussian 09<sup>2</sup> (G09) program package 3 employing the density functional theory (DFT) method with Becke's three-parameter hybrid functional and LeeYang-Parr's gradient corrected correlation functional (B3LYP).<sup>3</sup> The SDD basis set<sup>4</sup> and effective core potential were used for the Ru atom, and the 6-31 G\* basis set was applied for H, C, N, O and S.<sup>5</sup> The ground-state geometry of **1-4** was optimized in H<sub>2</sub>O using the conductive polarizable continuum model (CPCM), and frequency calculation was also performed to verify the optimized structure to be at an energy minimum. Time-dependent density functional theory (TD-DFT) calculation was used to characterize the properties of singlet and triplet excited states, and the CPCM model with H<sub>2</sub>O as solvent was applied to the solvent effect.

The photoinduced ligand dissociation experiments were carried out under irradiation of a 15 W LED lamp ( $\lambda = 470$  nm).

Supercoiled pBR322 plasmid DNA was used to study DNA photodamage. 40  $\mu$ L of pBR322 plasmid DNA (40  $\mu$ g/mL) was incubated with a complex dosed from 0 to 20 or 40  $\mu$ M. The mixture was irradiated with laser (355 nm, 90 mW) or LED lamp (470 nm, 15 W) for 8 minutes.

After irradiation and incubation at room temperature for 2 h, 10  $\mu$ L loading buffer was added. 10  $\mu$ L of sample was taken for agarose gel (1%) electrophoresis (in Tris-acetic acid-EDTA buffer, pH (8.0) at 5 V/cm for 1.5 h. The gel was stained with EB (1 mg/L in H<sub>2</sub>O) for 0.5 h and then analyzed using a Gel Doc XR system (Bio-Rad).

Anaerobic conditions were obtained by bubbling the solutions with high-purity argon for 20 min. All measurements were carried out at room temperature.

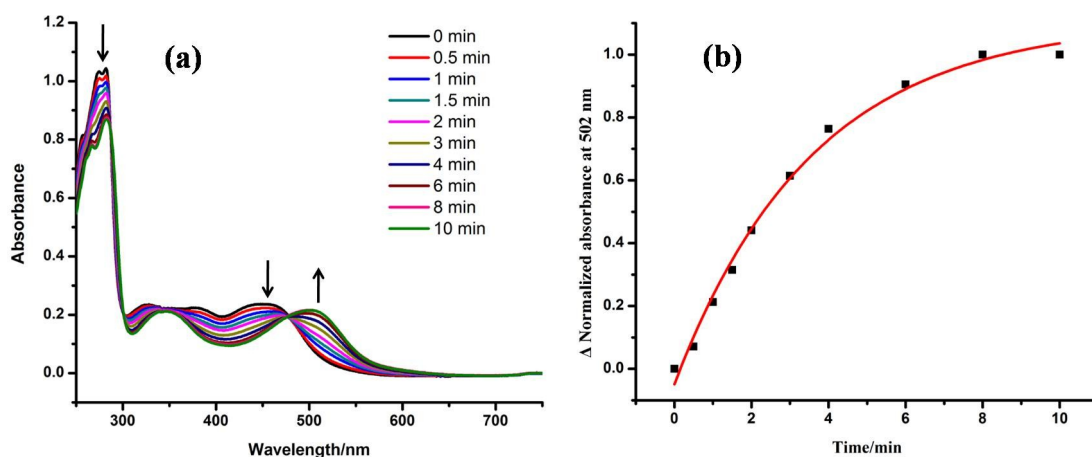

**Figure S1.** (a) Absorption spectra changes of **1** (25  $\mu\text{M}$ ) in Ar-saturated  $\text{H}_2\text{O}$  upon irradiation (470 nm). (b) Absorbance changes at 502 nm as a function of irradiation time.

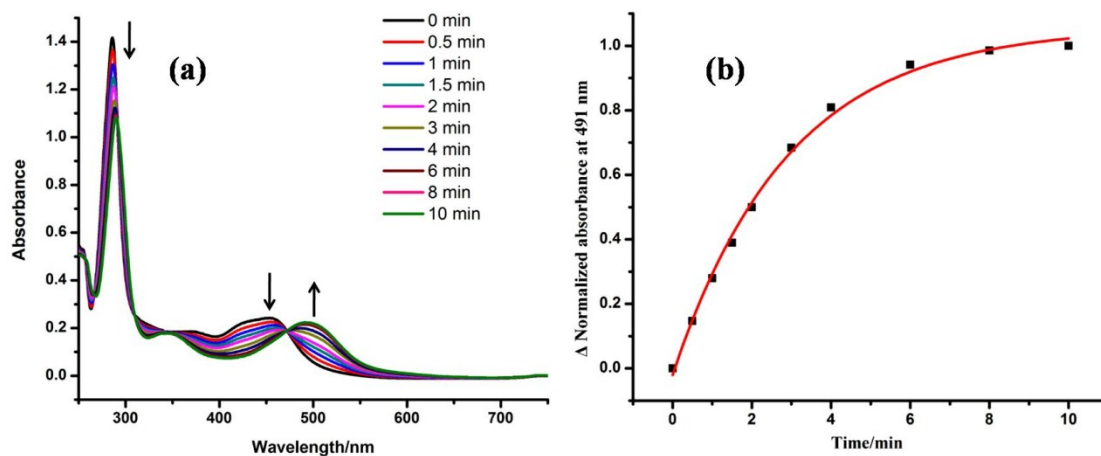

**Figure S2.** (a) Absorption spectra changes of **2** (25  $\mu\text{M}$ ) in Ar-saturated  $\text{H}_2\text{O}$  upon irradiation (470 nm). (b) Absorbance changes at 491 nm as a function of irradiation time.

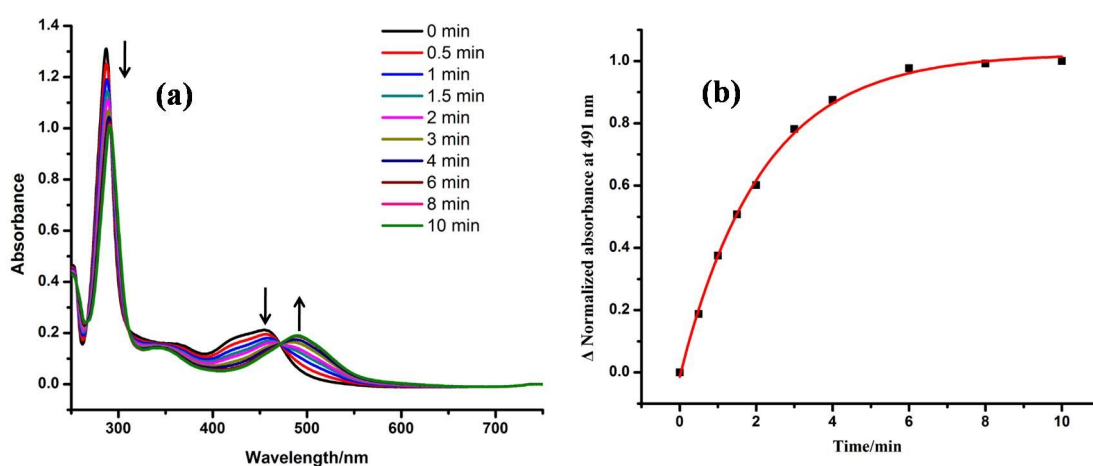

**Figure S3.** (a) Absorption spectra changes of **3** (25  $\mu\text{M}$ ) in Ar-saturated  $\text{H}_2\text{O}$  upon irradiation (470 nm). (b) Absorbance changes at 491 nm as a function of irradiation time.

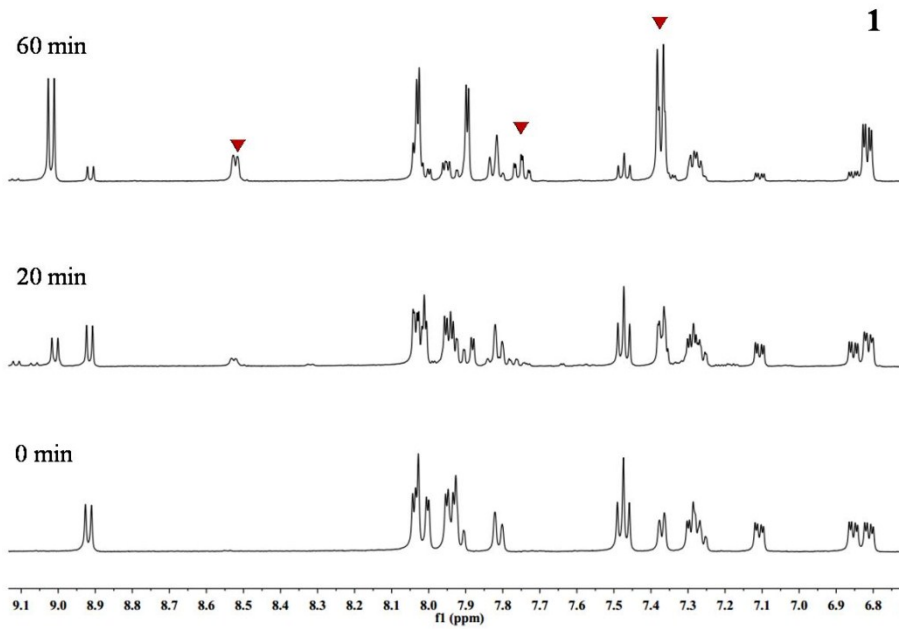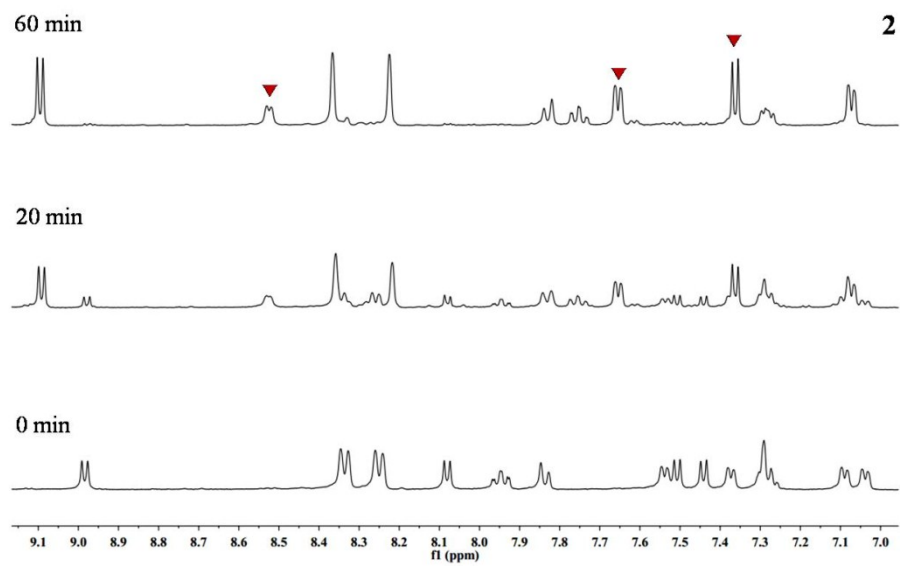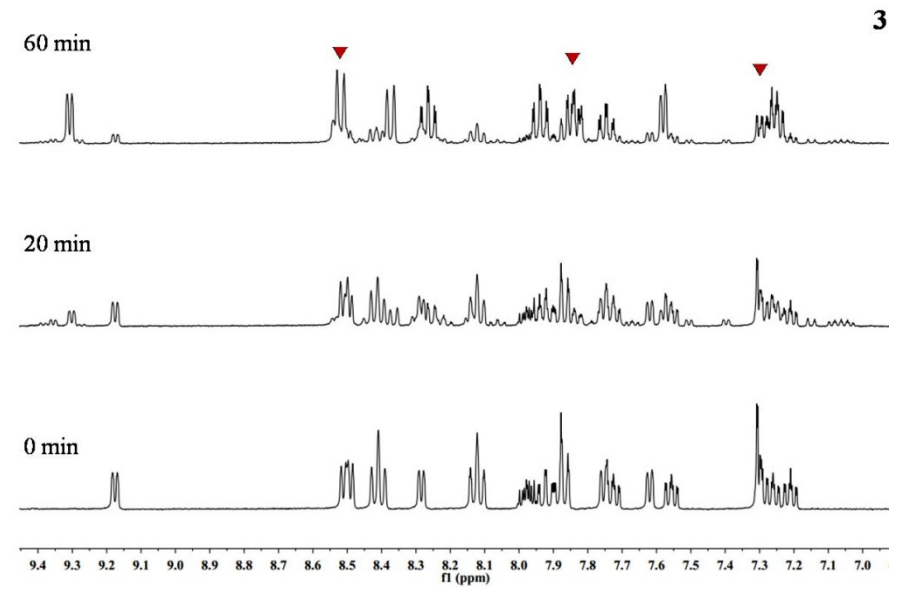

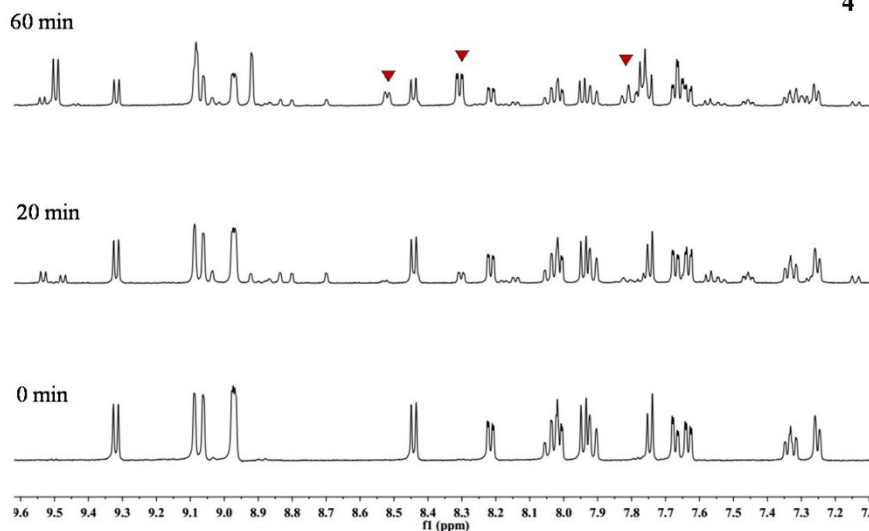

**Figure S4.**  $^1\text{H}$  NMR spectra changes of **1-4** in Ar-saturated  $\text{CD}_3\text{CN}$  before and after irradiation at 470 nm for 20 and 60 min. The red triangles indicate the chemical shifts from the free ligand of py- $\text{SO}_3$ .

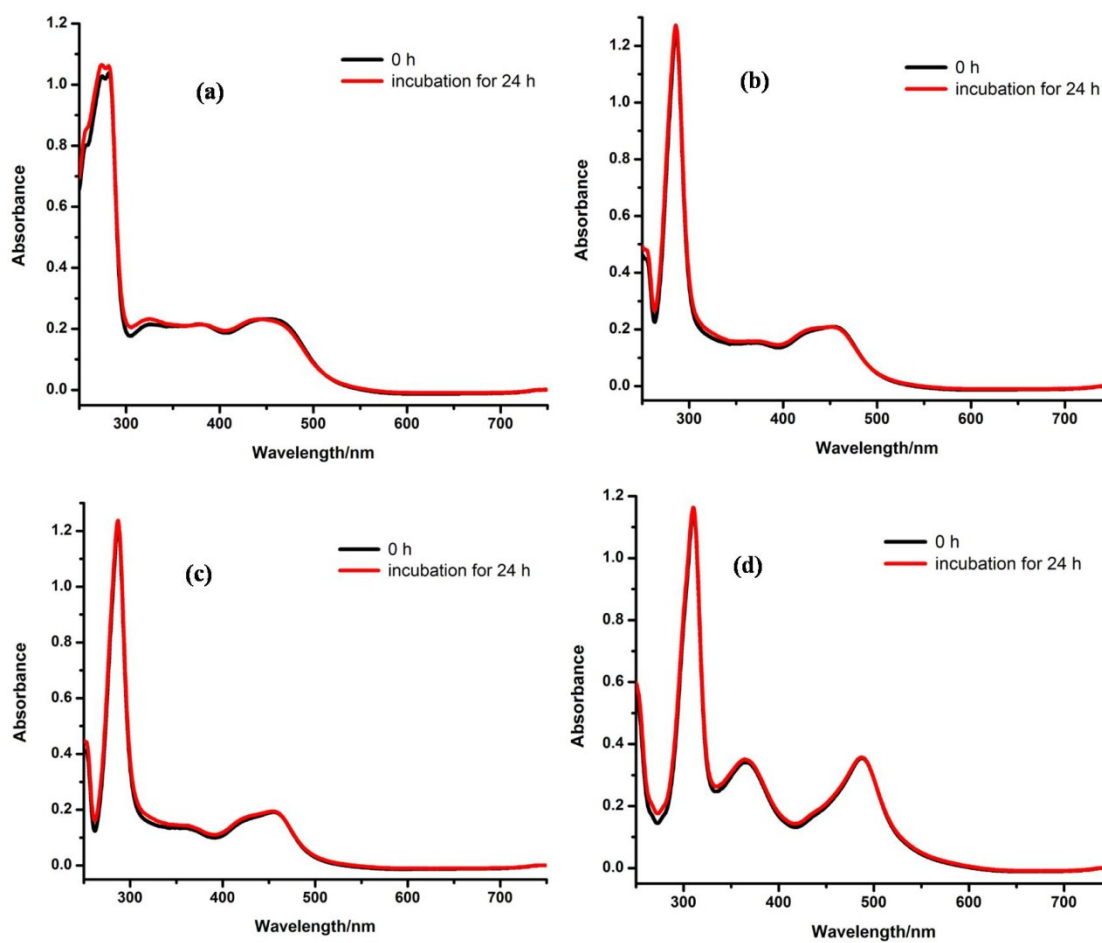

**Figure S5.** Absorption spectra of **1-4** (a-d, 25  $\mu\text{M}$ ) in aqueous solutions either freshly prepared or after standing for 24 h in the dark.

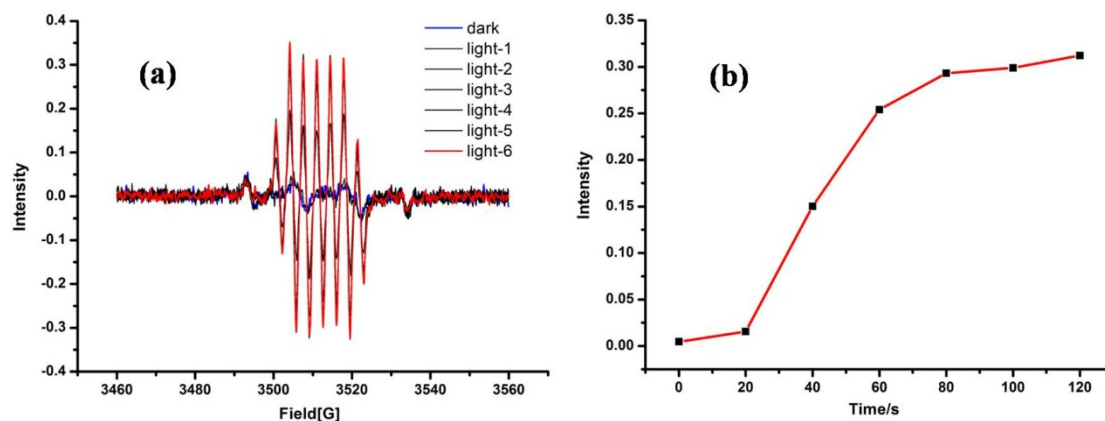

**Figure S6.** (a) EPR signals obtained upon laser irradiation (355 nm) of an Ar-saturated CH<sub>3</sub>CN solution of **1** and DMPO (50 mM). (b) EPR signal intensity changes as a function of irradiation time.

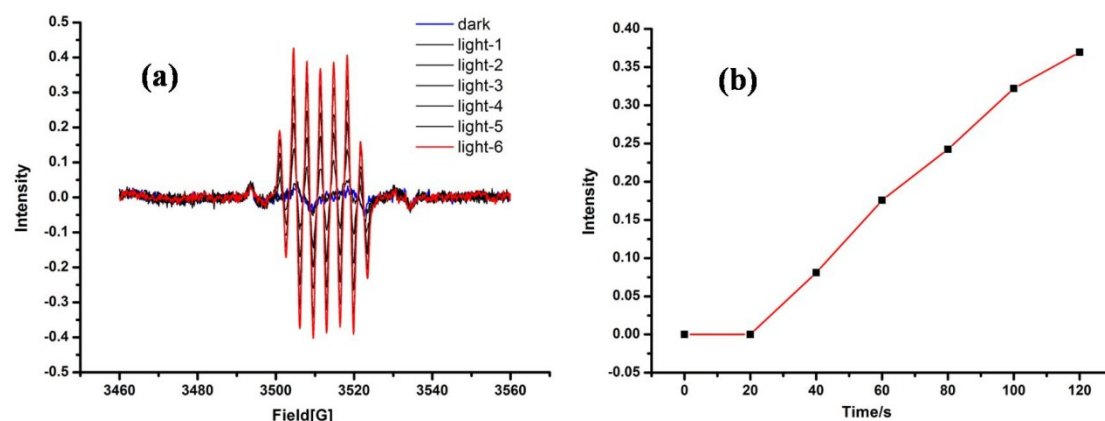

**Figure S7.** (a) EPR signals obtained upon laser irradiation (355 nm) of an Ar-saturated CH<sub>3</sub>CN solution of **2** and DMPO (50 mM). (b) EPR signal intensity changes as a function of irradiation time.

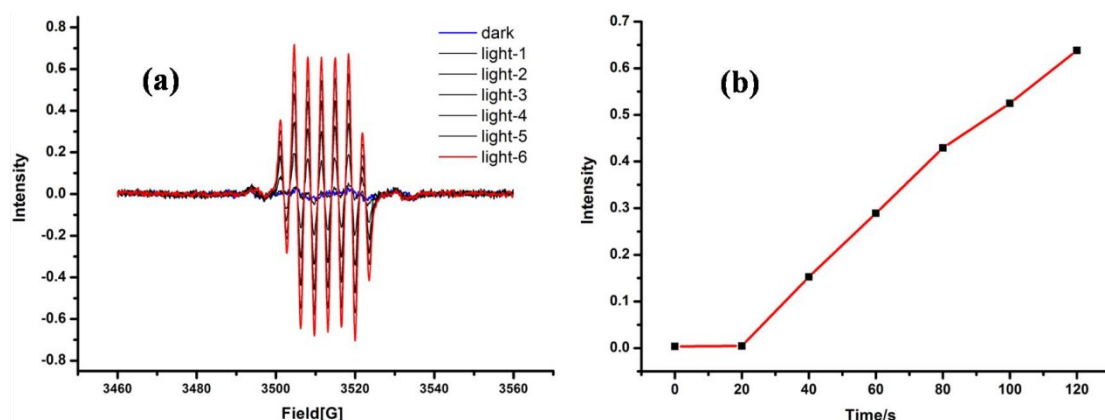

**Figure S8.** (a) EPR signals obtained upon laser irradiation (355 nm) of an Ar-saturated CH<sub>3</sub>CN solution of **3** and DMPO (50 mM). (b) EPR signal intensity changes as a function of irradiation time.

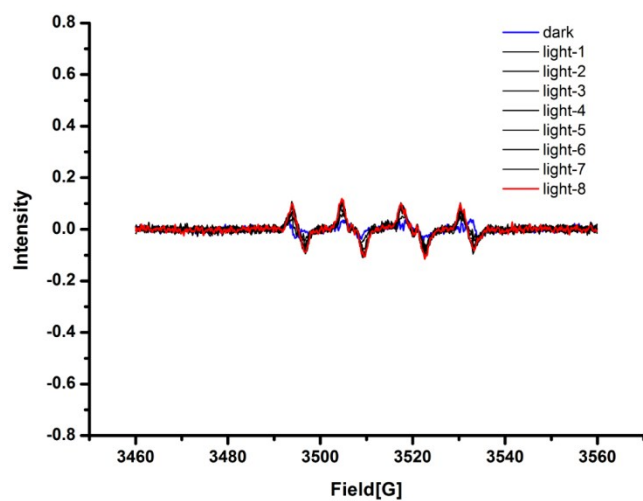

**Figure S9.** EPR signals obtained upon laser irradiation (532 nm) of an Ar-saturated  $\text{CH}_3\text{CN}$  solution of **4** and DMPO (50 mM).

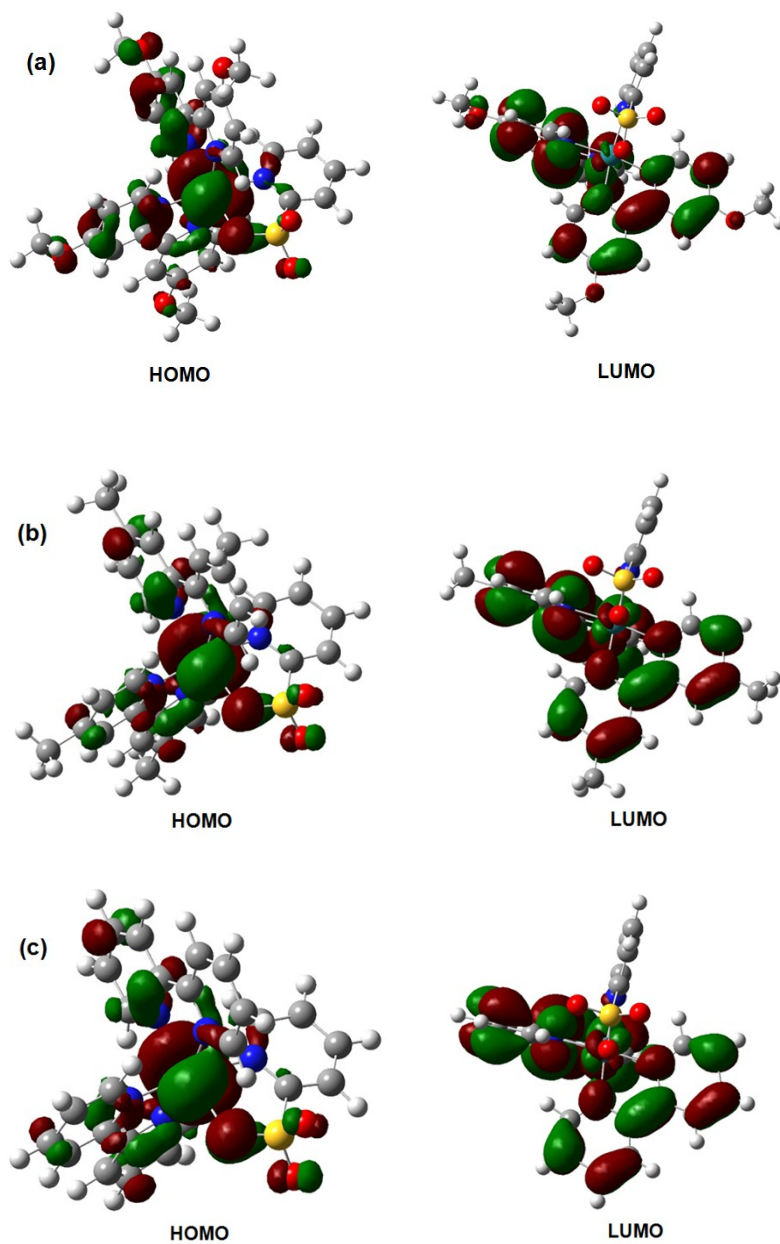

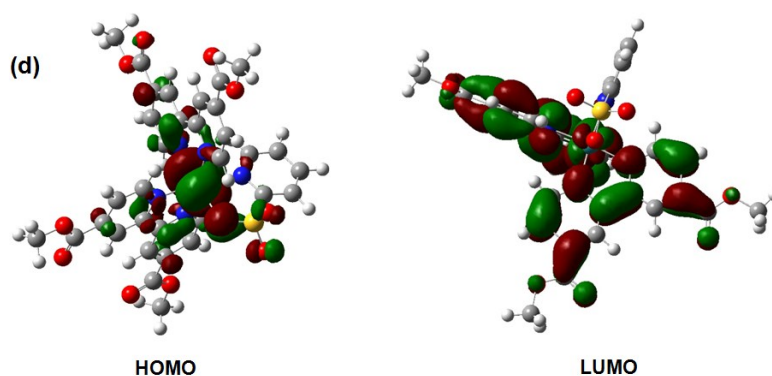

**Figure S10.** Calculated HOMO and LUMO orbitals of **1** (a), **2** (b), **3** (c), and **4** (d).

**Table S1.** Selected triplet excited states of **1** obtained from TD-DFT calculations (H = HOMO, L = LUMO).

| Triplet excited state | Energy (eV) | Wavelength (nm) | Oscillator strength (f) | Calculated transitions and orbital contributions                                  |
|-----------------------|-------------|-----------------|-------------------------|-----------------------------------------------------------------------------------|
| 1                     | 2.3441      | 528.92          | 0.000                   | H→L (61%)<br>H→L+3(3%)<br>H→L+8(26%)                                              |
| 2                     | 2.3956      | 517.54          | 0.000                   | H→L+1(82%)<br>H→L+5(3%)<br>H→L+8(6%)                                              |
| 4                     | 2.5128      | 493.40          | 0.000                   | H-2→L (3%)<br>H-2→L+1(4%)<br>H-1→L+1(20%)<br>H→L (18%)<br>H→L+1(7%)<br>H→L+8(38%) |
| 11                    | 2.9178      | 424.92          | 0.000                   | H-2→L (7%)<br>H-2→L+1(3%)<br>H-2→L+8(75%)<br>H-2→L+9(6%)                          |
| 38                    | 4.3355      | 285.97          | 0.000                   | H-14→L+2(6%) <b>H-9→L+2(26%)</b> <b>H-9→L+4(3%)</b> H-8→L+2(46%)<br>H-8→L+4(6%)   |



**Table S2.** Selected triplet excited states of **2** obtained from TD-DFT calculations (H = HOMO, L = LUMO).

| Triplet excited state | Energy (eV) | Wavelength (nm) | Oscillator strength (f) | Calculated transitions and orbital contributions                                                                                                   |
|-----------------------|-------------|-----------------|-------------------------|----------------------------------------------------------------------------------------------------------------------------------------------------|
| 1                     | 2.2741      | 545.19          | 0.000                   | H-1→L+1(3%)<br>H→L (72%)<br>H→L+1(8%)<br>H→L+8(8%)                                                                                                 |
| 2                     | 2.3009      | 538.84          | 0.000                   | H→L (7%)<br>H→L+1(79%)<br>H→L+8(4%)                                                                                                                |
| 6                     | 2.5586      | 484.58          | 0.000                   | H-2→L+1(3%)<br>H-1→L (8%)<br>H-1→L+1(3%)<br>H→L (14%)<br>H→L+8(65%)                                                                                |
| 12                    | 3.0309      | 409.07          | 0.000                   | H-2→L+12(5%)<br>H-1→L+8(6%)<br>H→L+9(17%)<br>H→L+11(3%)<br>H→L+12(59%)                                                                             |
| 40                    | 4.3405      | 285.64          | 0.000                   | H-11→L (3%)<br>H-9→L+1(3%)<br>H-8→L+1 (4%)<br>H-7→L (8%)<br>H-7→L+1(10%)<br><b>H-5→L (5%)</b><br><b>H-5→L+1(4%)</b><br>H-4→L+1(24%)<br>H-3→ L (7%) |

**Table S3.** Selected triplet excited states of **3** obtained from TD-DFT calculations (H = HOMO, L = LUMO).

| Triplet excited state | Energy (eV) | Wavelength (nm) | Oscillator strength (f) | Calculated transitions and orbital contributions                                                                                                                     |
|-----------------------|-------------|-----------------|-------------------------|----------------------------------------------------------------------------------------------------------------------------------------------------------------------|
| 1                     | 2.2839      | 542.87          | 0.000                   | H-1→L+1(3%)<br>H→L (63%)<br>H→L+1(18%)<br>H→L+8(5%)                                                                                                                  |
| 2                     | 2.3124      | 536.17          | 0.000                   | H→L (17%)<br>H→L+1(70%)<br>H→L+8(5%)                                                                                                                                 |
| 6                     | 2.5862      | 479.41          | 0.000                   | H-2→L+1(3%)<br>H-1→L (5%)<br>H→L (13%),<br>H→L+8(72%)                                                                                                                |
| 11                    | 3.0546      | 405.89          | 0.000                   | H-2→L+11(3%)<br>H-1→L+8(6%)<br>H→L+2(3%)<br>H→L+9(32%)<br>H→L+11(40%)                                                                                                |
| 41                    | 4.4399      | 279.25          | 0.000                   | H-12→L (6%)<br>H-12→L+1(5%)<br>H-11→L+1 (6%)<br><b>H-5→L (16%)</b><br><b>H-5→L+1(11%)</b><br>H-4→L+4(5%)<br>H-4→L+7(3%)<br>H-3→L+4(6%)<br>H-3→L+5(5%)<br>H-3→L+7(8%) |

**Table S4.** Selected triplet excited states of **4** obtained from TD-DFT calculations (H = HOMO, L = LUMO).

| Triplet excited state | Energy (eV) | Wavelength (nm) | Oscillator strength (f) | Calculated transitions and orbital contributions                                                      |
|-----------------------|-------------|-----------------|-------------------------|-------------------------------------------------------------------------------------------------------|
| 1                     | 2.0586      | 602.27          | 0.000                   | H-2→L+1(3%)<br>H-1→L+1(6%)<br>H→L (42%)<br>H→L+1(40%)                                                 |
| 2                     | 2.0964      | 591.43          | 0.000                   | H→L (45%)<br>H→L+1(47%)                                                                               |
| 7                     | 2.6290      | 471.59          | 0.000                   | H→L+8(90%)                                                                                            |
| 8                     | 2.8735      | 431.47          | 0.000                   | H-1→L+8(74%)<br>H→L+3 (7%)<br>H→L+11(8%)                                                              |
| 41                    | 4.0435      | 306.63          | 0.000                   | H-6→L+7(3%)<br><b>H-5→L (13%)</b><br><b>H-5→L+1(7%)</b><br>H-4→L (11%)<br>H-4→L+1(3%)<br>H-3→L+1(16%) |

**Table S5.** Calculated Oxygen Character in the Selected Molecular Orbitals of **1-4**.

|        | <b>1</b> | <b>2</b> | <b>3</b> | <b>4</b> |
|--------|----------|----------|----------|----------|
| HOMO   | 3.19%    | 4.14%    | 4.76%    | 6.00%    |
| HOMO-1 | 4.10%    | 4.02%    | 3.95%    | 4.16%    |
| HOMO-2 | 0.11%    | 0.40%    | 0.64%    | 0.75%    |
| HOMO-3 | 0.09%    | 0.58%    | 0.69%    | 1.51%    |
| HOMO-4 | 0.86%    | 0.99%    | 0.10%    | 0.15%    |
| HOMO-5 | 8.07%    | 20.18%   | 18.88%   | 14.43%   |
| HOMO-9 | 7.38%    | ---      | ---      | ---      |

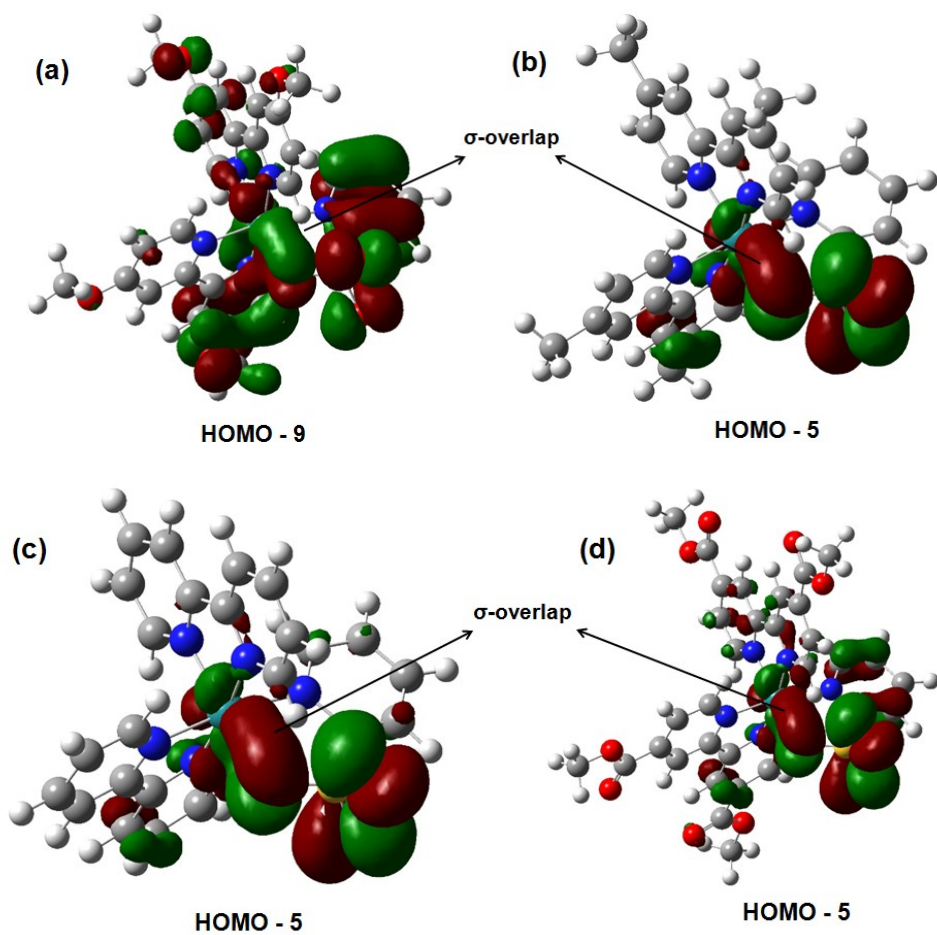

**Figure S11.**  $\sigma$ (Ru-O) orbitals of 1 (a), 2 (b), 3 (c) and 4 (d).

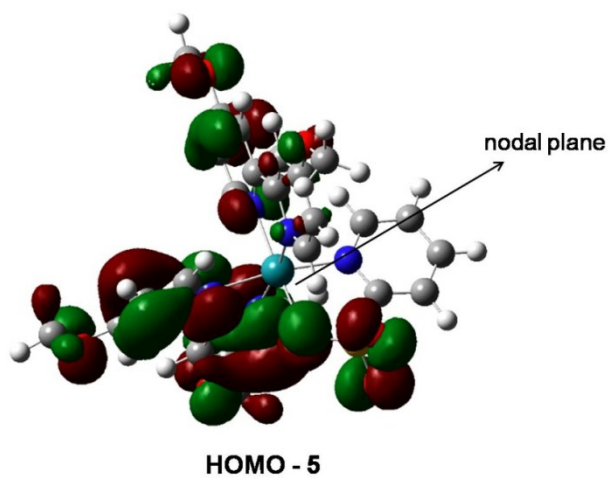

**Figure S12.** HOMO-5 orbital of 1.

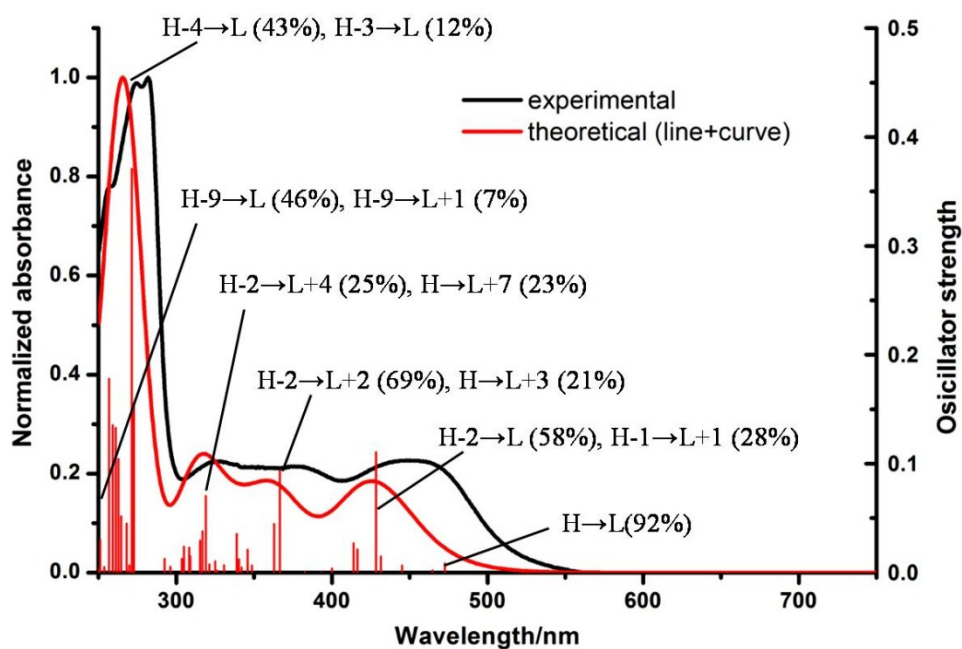

**Figure S13.** Normalized experimental and theoretical spectra of **1** in H<sub>2</sub>O. MO contributions and transition energies were calculated using TD-DFT and only select contributions greater than 5% are assigned (H = HOMO, L = LUMO).

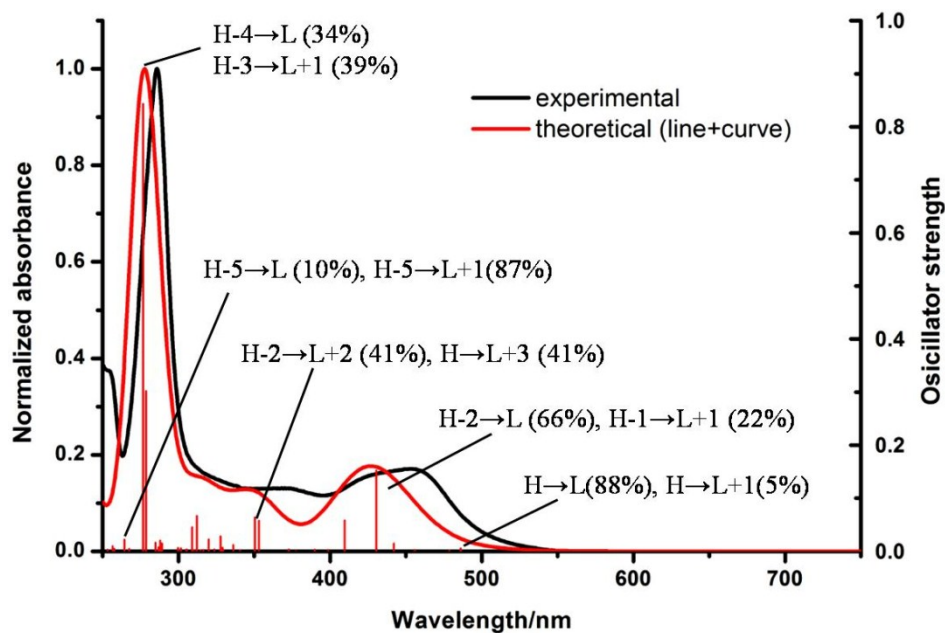

**Figure S14.** Normalized experimental and theoretical spectra of **2** in H<sub>2</sub>O. MO contributions and transition energies were calculated using TD-DFT and only select contributions greater than 5% are assigned (H = HOMO, L = LUMO).

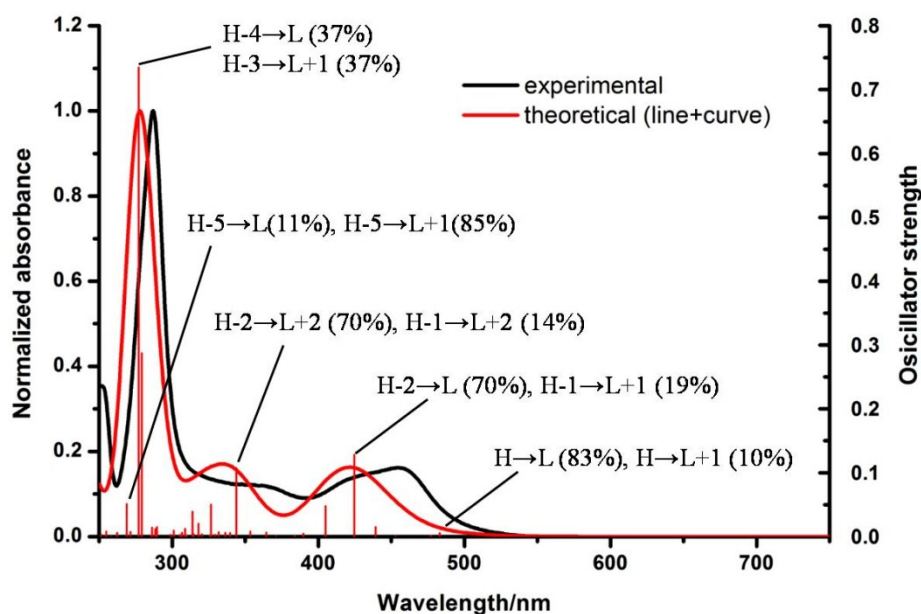

**Figure S15.** Normalized experimental and theoretical spectra of **3** in H<sub>2</sub>O. MO contributions and transition energies were calculated using TD-DFT and only select contributions greater than 5% are assigned (H = HOMO, L = LUMO).

**Table S6.** Selected TD-DFT singlet excited states of **1** and the transitions associated with these states in H<sub>2</sub>O (H = HOMO, L = LUMO).

| Singlet excited state | Energy (eV) | Wavelength (nm) | Oscillator strength (f) | Calculated transitions and orbital contributions                            |
|-----------------------|-------------|-----------------|-------------------------|-----------------------------------------------------------------------------|
| 1                     | 2.6235      | 472.58          | 0.0085                  | <b>H→L (92%)</b>                                                            |
| 5                     | 2.8949      | 428.29          | 0.1105                  | <b>H-2→L (58%)</b><br>H-1→L (10%)<br>H-1→L+1 (28%)                          |
| 11                    | 3.3819      | 366.61          | 0.0940                  | H-2→L+2 (69%)<br>H-1→L+2 (3%)<br>H→L+3 (21%)                                |
| 40                    | 4.8863      | 253.74          | 0.0053                  | H-9→L+2(6%)<br>H-6→L+2(18%)<br>H-5→L+2(36%)<br>H-4→L+2(19%)<br>H-3→L+2(13%) |
| 44                    | 4.9964      | 248.15          | 0.0381                  | H-10→L(3%)<br><b>H-9→L(46%)</b><br><b>H-9→L+1(7%)</b><br>H-4→L+1(30%)       |

**Table S7.** Selected TD-DFT singlet excited states of **2** and the transitions associated with these states in H<sub>2</sub>O (H = HOMO, L = LUMO).

| Singlet excited state | Energy (eV) | Wavelength (nm) | Oscillator strength (f) | Calculated transitions and orbital contributions  |
|-----------------------|-------------|-----------------|-------------------------|---------------------------------------------------|
| 1                     | 2.5514      | 485.94          | 0.0058                  | <b>H→L(88%)</b><br>H→L+1(5%)                      |
| 5                     | 2.8800      | 430.51          | 0.1528                  | <b>H-2→L (66%)</b><br>H-1→L (8%)<br>H-1→L+1 (22%) |
| 12                    | 3.5393      | 350.31          | 0.0641                  | H-2→L+2 (41%)<br>H-1→L+2 (6%)<br>H→L+3 (41%)      |
| 35                    | 4.6344      | 267.53          | 0.0051                  | H-5→L(86%)<br>H-5→L+1(9%)                         |
| 36                    | 4.6903      | 264.34          | 0.0222                  | <b>H-5→L(10%)</b><br><b>H-5→L+1(87%)</b>          |

**Table S8.** Selected TD-DFT singlet excited states of **3** and the transitions associated with these states in H<sub>2</sub>O (H = HOMO, L = LUMO).

| Singlet excited state | Energy (eV) | Wavelength (nm) | Oscillator strength (f) | Calculated transitions and orbital contributions             |
|-----------------------|-------------|-----------------|-------------------------|--------------------------------------------------------------|
| 1                     | 2.5661      | 483.15          | 0.0056                  | <b>H→L(83%)</b><br>H→L+1(10%)                                |
| 5                     | 2.9193      | 424.70          | 0.1285                  | <b>H-2→L (70%)</b><br>H-1→L (5%)<br>H-1→L+1 (19%)            |
| 12                    | 3.6047      | 343.95          | 0.1074                  | H-2→L+2 (70%)<br>H-1→L+2 (14%)<br>H-1→L+3 (4%)<br>H→L+6 (3%) |
| 35                    | 4.5679      | 271.43          | 0.0076                  | H-5→L(85%)<br>H-5→L+1(10%)                                   |
| 36                    | 4.6120      | 268.83          | 0.0513                  | <b>H-5→L(11%)</b><br><b>H-5→L+1(85%)</b>                     |

**Table S9.** Selected TD-DFT singlet excited states of **4** and the transitions associated with these states in H<sub>2</sub>O (H = HOMO, L = LUMO).

| Singlet excited state | Energy (eV) | Wavelength (nm) | Oscillator strength (f) | Calculated transitions and orbital contributions                                                      |
|-----------------------|-------------|-----------------|-------------------------|-------------------------------------------------------------------------------------------------------|
| 1                     | 2.3404      | 529.76          | 0.0102                  | <b>H→L (83%)</b><br>H→L+1(10%)                                                                        |
| 5                     | 2.7124      | 457.10          | 0.2160                  | <b>H-2→L (64%)</b><br>H-1→L (10%)<br>H-1→L+1 (22%)                                                    |
| 9                     | 3.2799      | 378.02          | 0.1300                  | H-1→L+1 (3%)<br><b>H-1→L+2 (21%)</b><br>H-1→L+3 (7%)<br>H→L+2 (4%)<br><b>H→L+3 (49%)</b><br>H→L+8(9%) |
| 24                    | 3.9585      | 313.21          | 0.0254                  | H-5→L (3%)<br>H-2→L+6(56%)<br>H-1→L+5 (10%)<br>H→L+3 (3%)<br>H→L+7 (4%)<br>H→L+11 (4%)                |
| 32                    | 4.1811      | 296.53          | 0.0054                  | H-6→L (3%)<br>H-5→L (83%)<br>H-1→L+7(6%)                                                              |
| 33                    | 4.2353      | 292.74          | 0.0695                  | <b>H-5→L (5%)</b><br><b>H-5→L+1(61%)</b><br>H-1→L+7(26%)                                              |

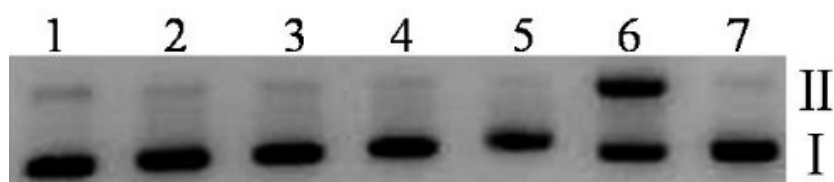

**Figure S16.** Agarose gel electrophoresis pattern of pBR322 DNA (100 mM in base pairs) in Ar-saturated Tris–EDTA (5 mM, pH = 7.5) upon irradiation (470 nm) for 8 min in the presence of varied concentrations of **4**. Lane 1, DNA alone; lane 2, 5 μM; lane 3, 10 μM; lane 4, 20 μM; lane 5, 40 μM; lane 6, [Ru(bpy)<sub>3</sub>]<sup>2+</sup> (100 μM), air-saturated; lane 7, 50 μM (dark). I and II denote supercoiled circular and nicked circular plasmid DNA, respectively.



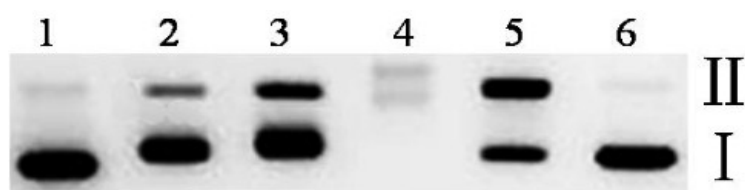

**Figure S17.** Agarose gel electrophoresis pattern of pBR322 DNA (100 mM in base pairs) in Ar-saturated Tris-EDTA (5 mM, pH = 7.5) upon irradiation (355 nm) for 8 min in the presence of varied concentrations of **3**. Lane 1, DNA alone; lane 2, 5  $\mu\text{M}$ ; lane 3, 10  $\mu\text{M}$ ; lane 4, 20  $\mu\text{M}$ ; lane 5,  $[\text{Ru}(\text{bpy})_3]^{2+}$  (100  $\mu\text{M}$ ), (air-saturated, 470 nm LED, 15W, 15 min); lane 6, 50  $\mu\text{M}$  (dark). I and II denote supercoiled circular and nicked circular plasmid DNA, respectively.

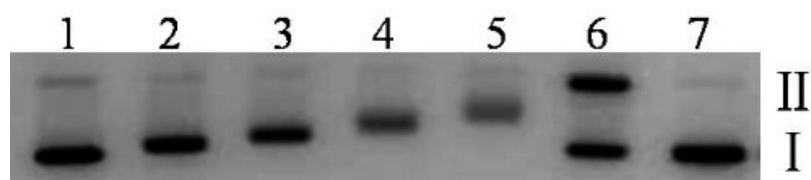

**Figure S18.** Agarose gel electrophoresis pattern of pBR322 DNA (100 mM in base pairs) in Ar-saturated Tris-EDTA (5 mM, pH = 7.5) upon irradiation (470 nm) for 8 min in the presence of varied concentrations of **3**. Lane 1, DNA alone; lane 2, 5  $\mu\text{M}$ ; lane 3, 10  $\mu\text{M}$ ; lane 4, 20  $\mu\text{M}$ ; lane 5, 40  $\mu\text{M}$ ; lane 6,  $[\text{Ru}(\text{bpy})_3]^{2+}$  (100  $\mu\text{M}$ ), air-saturated; lane 7, 50  $\mu\text{M}$  (dark). I and II denote supercoiled circular and nicked circular plasmid DNA, respectively.

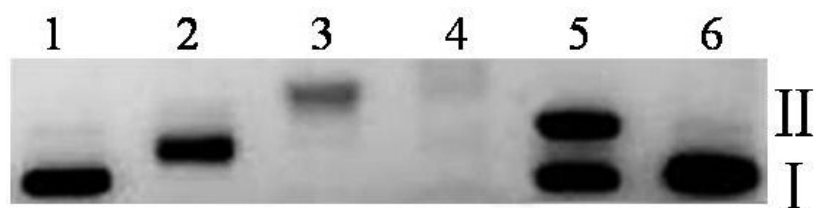

**Figure S19.** Agarose gel electrophoresis pattern of pBR322 DNA (100 mM in base pairs) in Ar-saturated Tris-EDTA (5 mM, pH = 7.5) upon irradiation (355 nm) for 8 min in the presence of varied concentrations of **1**. Lane 1, DNA alone; lane 2, 5  $\mu\text{M}$ ; lane 3, 10  $\mu\text{M}$ ; lane 4, 20  $\mu\text{M}$ ; lane 5,  $[\text{Ru}(\text{bpy})_3]^{2+}$  (100  $\mu\text{M}$ ), (air-saturated, 470 nm LED, 15 W, 15 min); lane 6, 50  $\mu\text{M}$  (dark). I and II denote supercoiled circular and nicked circular plasmid DNA, respectively.

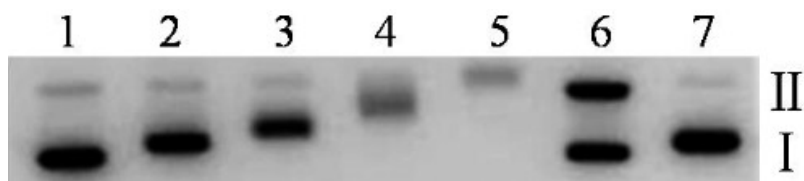

**Figure S20.** Agarose gel electrophoresis pattern of pBR322 DNA (100 mM in base pairs) in Ar-saturated Tris-EDTA (5 mM, pH = 7.5) upon irradiation (470 nm) for 8 min in the presence of varied concentrations of **1**. Lane 1, DNA alone; lane 2, 5  $\mu\text{M}$ ; lane 3, 10  $\mu\text{M}$ ; lane 4, 20  $\mu\text{M}$ ; lane 5, 40  $\mu\text{M}$ ; lane 6,  $[\text{Ru}(\text{bpy})_3]^{2+}$  (100  $\mu\text{M}$ ), air-saturated; lane 7, 50  $\mu\text{M}$  (dark). I and II denote supercoiled circular and nicked circular plasmid DNA, respectively.

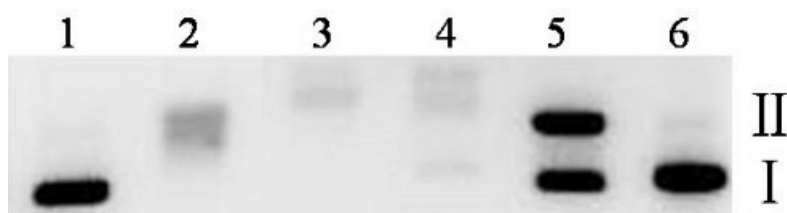

**Figure S21.** Agarose gel electrophoresis pattern of pBR322 DNA (100 mM in base pairs) in Ar-saturated Tris-EDTA (5 mM, pH = 7.5) upon irradiation (355 nm) for 8 min in the presence of varied concentrations of **2**. Lane 1, DNA alone; lane 2, 5  $\mu\text{M}$ ; lane 3, 10  $\mu\text{M}$ ; lane 4, 20  $\mu\text{M}$ ; lane 5,  $[\text{Ru}(\text{bpy})_3]^{2+}$  (100  $\mu\text{M}$ ), (air-saturated, 470 nm LED, 15 W, 15 min); lane 6, 50  $\mu\text{M}$  (dark). I and II denote supercoiled circular and nicked circular plasmid DNA, respectively.

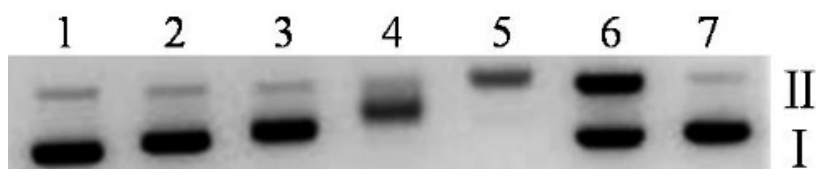

**Figure S22.** Agarose gel electrophoresis pattern of pBR322 DNA (100 mM in base pairs) in Ar-saturated Tris-EDTA (5 mM, pH = 7.5) upon irradiation (470 nm) for 8 min in the presence of varied concentrations of **2**. Lane 1, DNA alone; lane 2, 5  $\mu\text{M}$ ; lane 3, 10  $\mu\text{M}$ ; lane 4, 20  $\mu\text{M}$ ; lane 5, 40  $\mu\text{M}$ ; lane 6,  $[\text{Ru}(\text{bpy})_3]^{2+}$  (100  $\mu\text{M}$ ), air-saturated; lane 7, 50  $\mu\text{M}$  (dark). I and II denote supercoiled circular and nicked circular plasmid DNA, respectively.

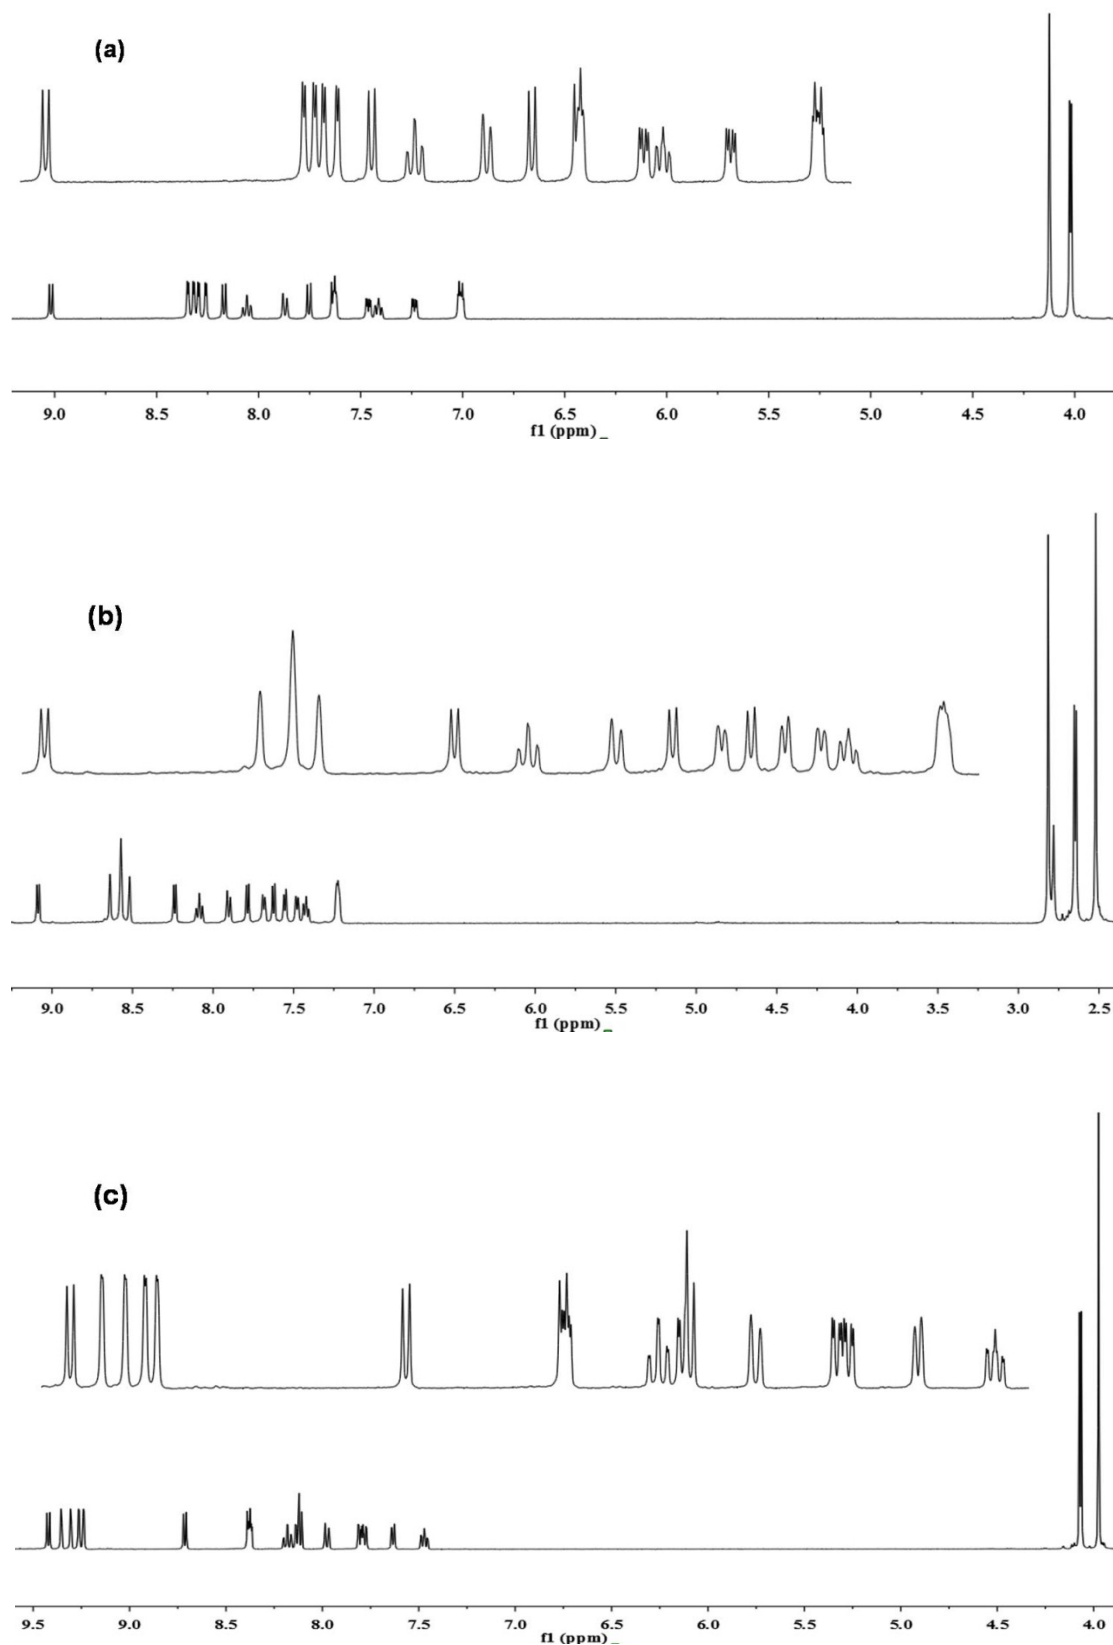

**Figure S23.** <sup>1</sup>H NMR spectra of **1** (a), **2** (b), and **4** (c) in (CD<sub>3</sub>)<sub>2</sub>CO.

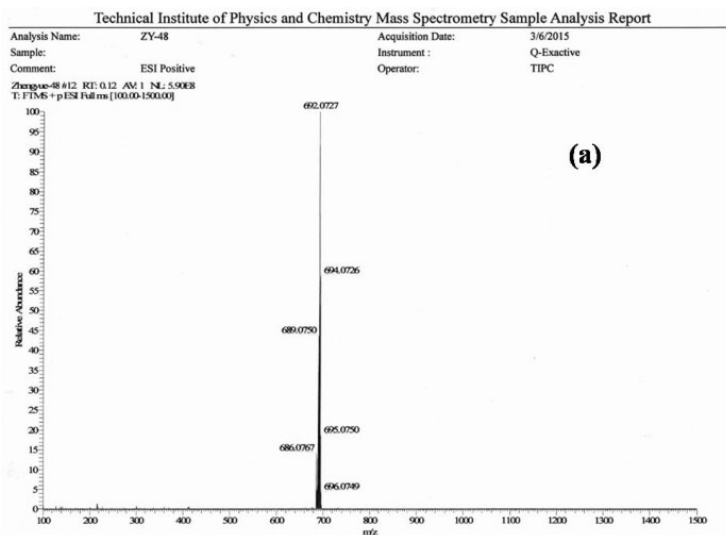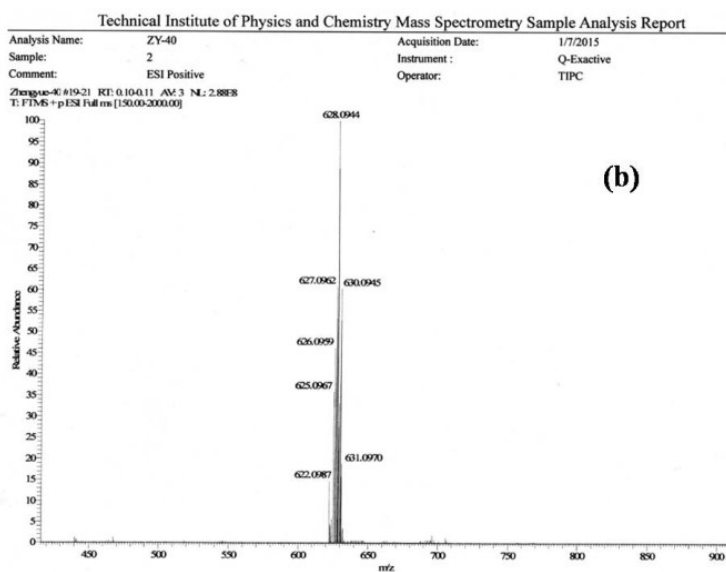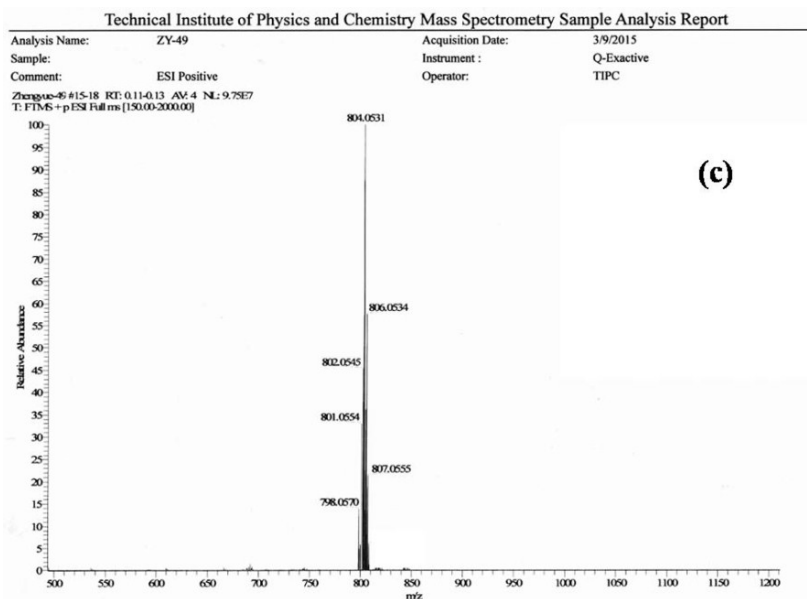

Figure S24. HR ESI-MS spectra of **1** (a), **2** (b), and **4** (c) in CH<sub>3</sub>CN.

## References

1. M. Kepczynski, R. P. Pandian, K. M. Smith; and B. Ehrenberg, *Photochem. Photobiol.* 2002, **76**, 127-134.
2. M. J. Frisch, G. W. Trucks, H. B. Schlegel, G. E. Scuseria, M. A. Robb, J. R. Cheeseman, G. Scalmani, V. Barone, B. Mennucci, G. A. Petersson, H. Nakatsuji, M. Caricato, X. Li, H. P. Hratchian, A. F. Izmaylov, J. Bloino, G. Zheng, J. L. Sonnenberg, M. Hada, M. Ehara, K. Toyota, R. Fukuda, J. Hasegawa, M. Ishida, T. Nakajima, Y. Honda, O. Kitao, H. Nakai, T. Vreven, J. A. Montgomery Jr., J. E. Peralta, F. Ogliaro, M. Bearpark, J. J. Heyd, E. Brothers, K. N. Kudin, V. N. Staroverov, R. Kobayashi, J. Normand, K. Raghavachari, A. Rendell, J. C. Burant, S. S. Iyengar, J. Tomasi, M. Cossi, N. Rega, J. M. Millam, M. Klene, J. E. Knox, J. B. Cross, V. Bakken, C. Adamo, J. Jaramillo, R. Gomperts, R. E. Stratmann, O. Yazyev, A. J. Austin, R. Cammi, C. Pomelli, J. W. Ochterski, R. L. Martin, K. Morokuma, V. G. Zakrzewski, G. A. Voth, P. Salvador, J. J. Dannenberg, S. Dapprich, A. D. Daniels, Ö. Farkas, J. B. Foresman, J. V. Ortiz, J. Cioslowski, D. J. Fox, *Gaussian 09*, revision A.1, Gaussian, Inc., Wallingford, CT, **2009**.
3. (a) A. D. Becke, *J. Chem. Phys.*, 1993, **98**, 5648-5652; (b) C. Lee, W. Yang and R. G. Parr, *Phys. Rev. B: Condens. Matter.*, 1988, **37**, 785-789.
4. L. E. Roy, P. J. Hay and R. L. Martin, *J. Chem. Theory Comput.*, 2008, **4**, 1029-1031.
5. (a) P. C. Harihara and J. A. Pople, *Theor. Chim. Acta*, 1973, **28**, 213-222; (b) M. M. Francl, W. J. Pietro, W. J. Hehre, J. S. Binkley, M. S. Gordon, D. J. Defrees and J. A. Pople, *J. Chem. Phys.*, 1982, **77**, 3654-3665.
